# Supplementary material for: Organic–inorganic hybrid multifunctional materials with high-Tc reversible phase transition and wide bandgap properties
Source: Royal Society of Chemistry journal article supplement (doi:10.1039/d3ma00461a), 2023-01-01
Supplement: d3ma00461a1.pdf [file d3ma00461a1.pdf]

# Organic-Inorganic Hybrid Multifunctional Materials with High-Tc Reversible Phase Transition and Wide Bandgap Properties

Yu-Xin Tan<sup>1,2</sup>, Ting-Ting Ying<sup>1,2\*</sup>, Fan-Xiao Wei<sup>2</sup>, Yan-Le Huang<sup>2</sup>, Ming-Yang Wan<sup>2</sup>, Qiao-Lin Li<sup>2</sup>, Fang-Xin Wang<sup>2</sup>, Meng-Na Wang<sup>2</sup>

<sup>1</sup>Guangzhou newlife new material Co.,Ltd, Guangzhou,510000, GuangDong Province, P. R. China

<sup>2</sup>Jiangxi Provincial Key Laboratory of Functional Molecular Materials Chemistry, Jiangxi University of Science and Technology, Ganzhou, 341000, Jiangxi Province, P. R. China

\*Corresponding authors.

E-mail addresses: [YingTT3127@163.com](mailto:YingTT3127@163.com) (T.-T. Ying)

## Experimental Section

### Material synthesis and crystal growth

All reagents and solvents used in the synthesis are reagent grade and used without further purification. Weigh 1 mmol n-propyl-N-methylpiperidine and 2 mmol tetra Cadmium bromide hydrate, dissolve them in a mixture of 15 mL methanol and distilled water (1:1), stir for 30 min, and filter to obtain a colorless solution. After standing for volatilization, colorless transparent crystal compound **1** was obtained after one week:  $[C_5H_{10}N(CH_3)CH_2CH_2CH_3]_2CdBr_4$  (**1**). Elemental analysis, calculated (%) **1**: C, 30.15; N, 3.910; H, 5.627. Found: C,30.12; N, 3.906; H, 5.629.

### Differential Scanning Calorimetry (DSC) and Thermogravimetric Analysis (TGA)

The thermal properties of compound **1** was measured by differential scanning calorimetry (DSC) at a temperature change rate of 10 K/min during both cooling and heating cycles. The thermogravimetric analysis (TGA) measurement was performed on the TA-Instruments STD2960 system, and its temperature was from room temperature to 1100 K at a rate of 10 K/min.

## Single Crystal X-Ray Diffraction Determination

Single crystal X-ray diffraction were carried out with the Bruker Smart Apex II single crystal diffractometer, which used a graphite monochromatic molybdenum sealed tube source ( $K_{\alpha}$  radiation,  $\lambda = 0.71073$ ). The single crystal structure data was collected at 300 K in the normal temperature stage, and the temperature of the sample was kept stable with a nitrogen stream, using the Cryostream Plus (Oxford Refrigeration System Company) accessory. The measured data uses the SHELXS and SHELXL programs, the related structural problems have been solved. The crystallographic information of the **1** determined at 300 K has been deposited in the CIF format in the Cambridge Crystallographic Database Center as supporting information (**1-LTP** CCDC 2282715).

## Dielectric Measurement

The crystal is ground into powder particles and then pressed into tablets, and silver glue is thinly coated on the surface to make an electrode for dielectric research. In the temperature range (340 K - 400 K) of heating and cooling process, we measured the dielectric constant of the compounds with Agilent or TH2828A impedance analyzer at a frequency of 1 MHz.

## UV-Vis Absorption

A Shimadzu UV-2550 spectrophotometer was used to measure UV-vis absorption spectra of crystal powder **1** in the range of 300-700 nm. The band gap is determined by the change of *Tauc's* equation:

$$[h\nu \cdot F(R_{\infty})]^{1/n} = A(h\nu - E_g)$$

Where  $h$  is the Planck constant,  $\nu$  is the vibration frequency,  $A$  is the proportional constant,  $E_g$  is the band gap, and  $F(R_{\infty})$  comes from the *Kubelka-Munk* equation:

$$F(R_{\infty}) = (1 - R_{\infty})^2 / 2R_{\infty}$$

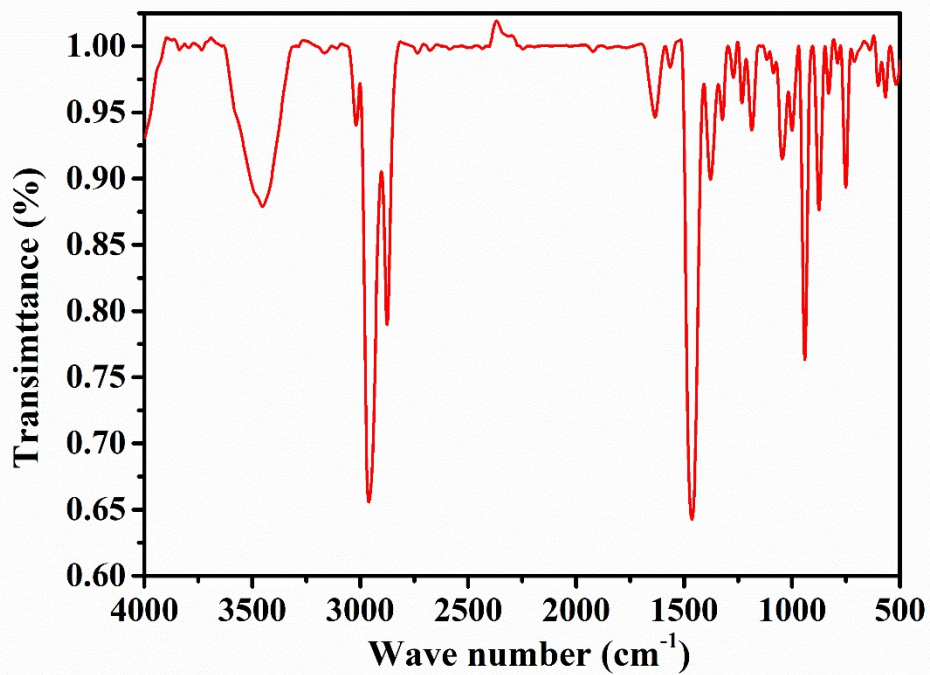

Fig. S1 Infrared spectrum of **1**.

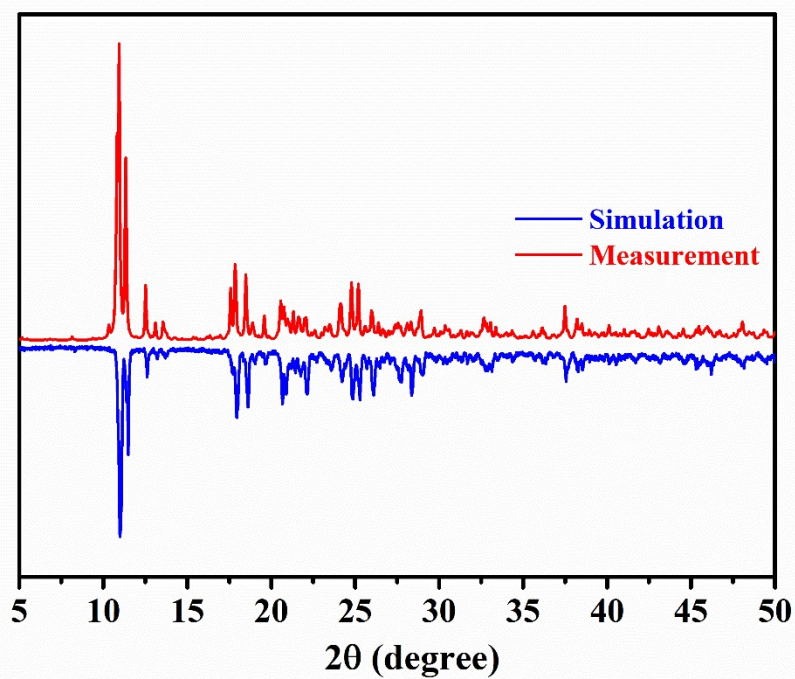

Fig. S2. The powder XRD of **1** with the simulated one in red and the measurement in blue.

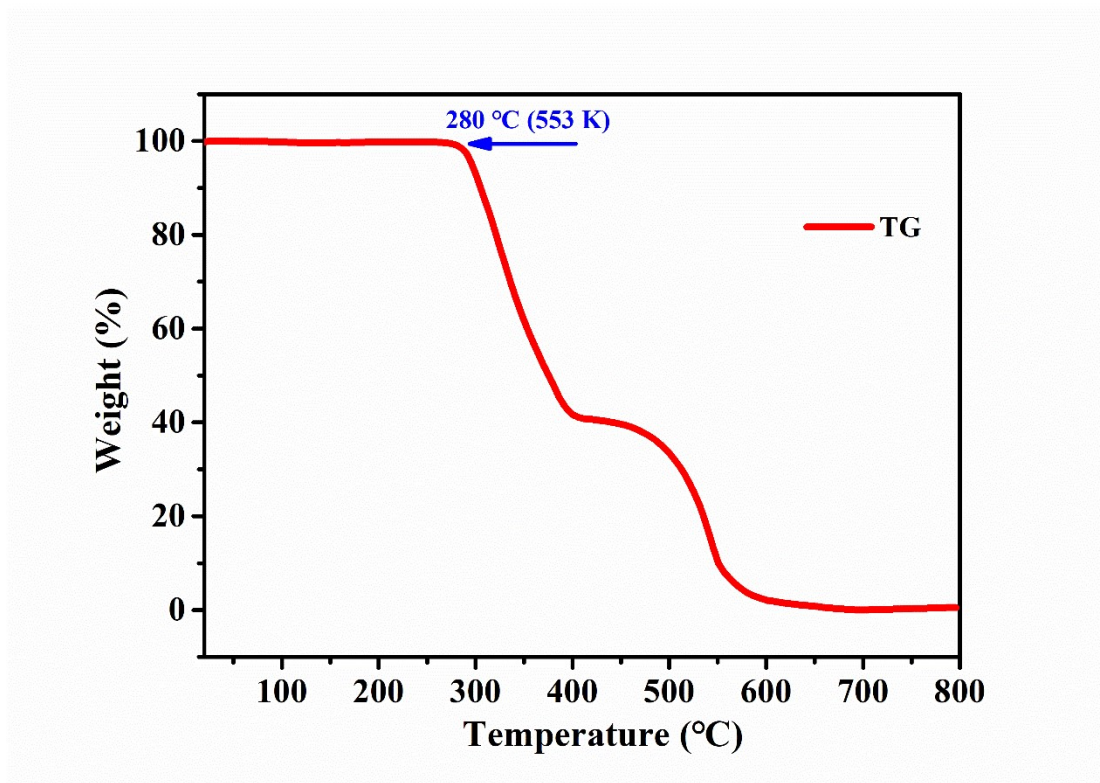

Fig. S3 TGA diagram for 1

Table S1 Crystal data and structure refinement for 1

| Compound                                | 1                             |
|-----------------------------------------|-------------------------------|
| Empirical formula                       | $C_{18}H_{40}Br_4CdN_2$       |
| Formula weight                          | 716.53                        |
| Temperature/K                           | 293.0                         |
| Crystal system                          | triclinic                     |
| Space group                             | $P-1$                         |
| $a/\text{\AA}$                          | 16.8749(14)                   |
| $b/\text{\AA}$                          | 19.2139(15)                   |
| $c/\text{\AA}$                          | 19.8184(15)                   |
| $\alpha/^\circ$                         | 118.783(2)                    |
| $\beta/^\circ$                          | 92.300(2)                     |
| $\gamma/^\circ$                         | 103.276(2)                    |
| Volume/ $\text{\AA}^3$                  | 5395.1(7)                     |
| $Z$                                     | 4                             |
| $\rho_{\text{calc}}/\text{g/cm}^3$      | 1.764                         |
| $\mu/\text{mm}^{-1}$                    | 6.740                         |
| $F(000)$                                | 2800.0                        |
| Final R indexes [ $I \geq 2\sigma(I)$ ] | $R_1 = 0.1389, wR_2 = 0.2239$ |
| Final R indexes [all data]              | $R_1 = 0.2067, wR_2 = 0.2510$ |

## Calculation of $\Delta S$ and N

1:

In the heating cycle mode

$$\Delta S_H = R \ln N_1$$

$$= \int_{T_2}^{T_1} \frac{Q}{T} dT$$

$$= \frac{11.14 \text{ J} \cdot \text{g}^{-1} \times 716.6 \text{ g} \cdot \text{mol}^{-1}}{333.0 \text{ K}}$$

$$= 23.97 \text{ J} \cdot \text{mol}^{-1} \cdot \text{K}^{-1}$$

$$N_1 = \exp\left(\frac{\Delta S_2}{R}\right)$$

$$= \exp\left(\frac{23.97 \text{ J} \cdot \text{mol}^{-1} \cdot \text{K}^{-1}}{8.314 \text{ J} \cdot \text{mol}^{-1} \cdot \text{K}^{-1}}\right)$$

$$= 17.87$$

**In the cooling cycle mode**

$$\Delta S_C = R \ln N_2$$

$$= \int_{T_1}^{T_2} \frac{Q}{T} dT$$

$$= \frac{10.92 \text{ J} \cdot \text{g}^{-1} \times 716.6 \text{ g} \cdot \text{mol}^{-1}}{325.0 \text{ K}}$$

$$= 24.08 \text{ J} \cdot \text{mol}^{-1} \cdot \text{K}^{-1}$$

$$N_2 = \exp\left(\frac{\Delta S_2}{R}\right)$$

$$= \exp\left(\frac{24.08 \text{ J} \cdot \text{mol}^{-1} \cdot \text{K}^{-1}}{8.314 \text{ J} \cdot \text{mol}^{-1} \cdot \text{K}^{-1}}\right)$$

= 18.11
